# Supplementary material for: Synergistic effects of l-theanine and epigallocatechin gallate in alleviating ovalbumin allergy by regulating intestinal immunity through inhibition of mast cell degranulation
Source: Royal Society of Chemistry journal article supplement (doi:10.1039/d2fo03404b), 2023-01-01

Table S1. Diarrhea scores of mice

| Score | Diarrhea level      |
|-------|---------------------|
| 0     | Solid feces         |
| 1     | Slightly soft feces |
| 2     | Unformed feces      |
| 3     | Loose feces         |

Table S2. Allergy scores of mice

| Score | Allergy symptoms                                                |
|-------|-----------------------------------------------------------------|
| 0     | None                                                            |
| 1     | Repeated rubbing around the mouth, nose, and head               |
| 2     | Puffiness around the eyes and nose, increased breathing rate    |
| 3     | Difficulty breathing, purple mouth, nose, and tail              |
| 4     | Loss of consciousness, low or no energy, tremors or convulsions |
| 5     | Death                                                           |

Table S3. Histopathology score of the jejunum

| Score | Inflammation                                               | Crypts                     | Ulcers                              | Edema  |
|-------|------------------------------------------------------------|----------------------------|-------------------------------------|--------|
| 0     | None                                                       | None                       | None                                | None   |
| 1     | Occasional                                                 | Some damage                | Small ulcers are occasionally found | Exists |
| 2     | Inflammation of the submucosa cells                        | Shortened and spaced apart | Ulcers are often found              |        |
| 3     | Inflammation of the submucosa and lamina propria           | Large area without crypts  | Large ulcer                         |        |
| 4     | Extensive inflammation of the submucosa and lamina propria | Complete disappearance     |                                     |        |

WB1:

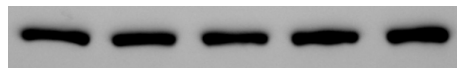

Lyn

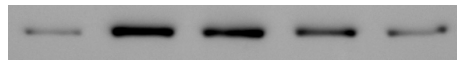

p-Lyn

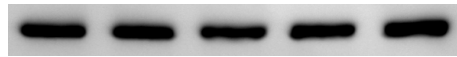

Syk

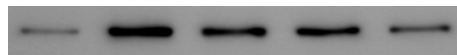

p-Syk

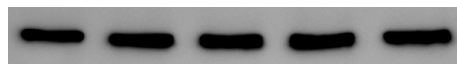

AKT

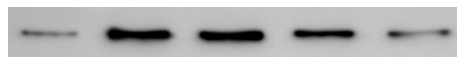

p-AKT

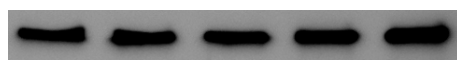

PI3K

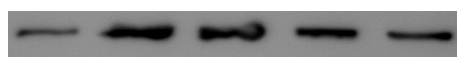

p-PI3K

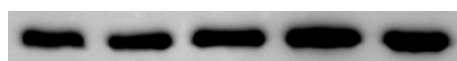

PLC $\gamma$

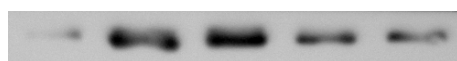

p-PLC $\gamma$

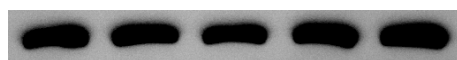

Btk

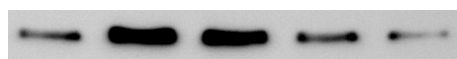

p-Btk

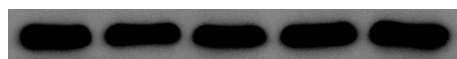

actin

WB2:

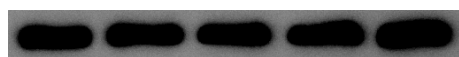

Lyn

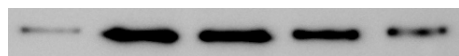

p-Lyn

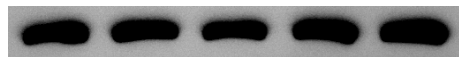

Syk

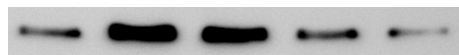

p-Syk

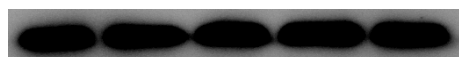

AKT

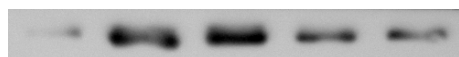

p-AKT

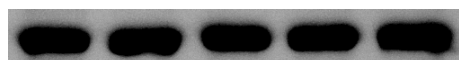

PI3K

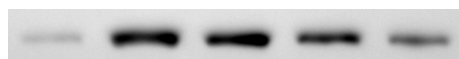

p-PI3K

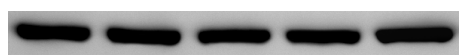

PLCγ

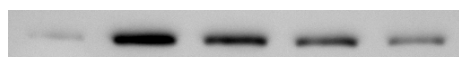

p-PLCγ

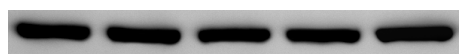

Btk

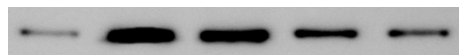

p-Btk

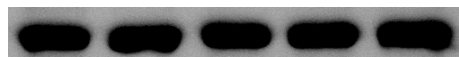

actin

WB3:

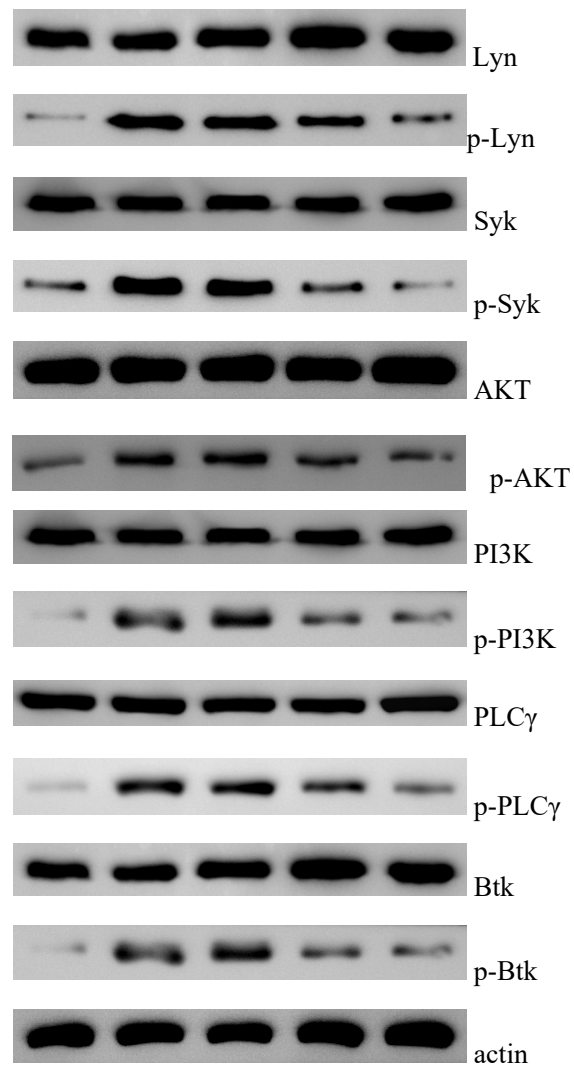

Supplement: d2fo03404b2.pdf [file d2fo03404b2.pdf]
