# Supplementary material for: Synergistic effects of l-theanine and epigallocatechin gallate in alleviating ovalbumin allergy by regulating intestinal immunity through inhibition of mast cell degranulation
Source: Royal Society of Chemistry journal article supplement (doi:10.1039/d2fo03404b), 2023-01-01
Supplement: d2fo03404b1.xlsx [file d2fo03404b1.xlsx]

## Sheet: OVA dose selection
allergy score					Diarrhea score
CK	LOVA	MOVA	HOVA		CK	LOVA	MOVA	HOVA
0	2	2	2		0	2	1	2
0	3	3	4		0	2	3	2
0	3	3	4		0	3	2	3
0	2	4	3		0	2	2	2
0	3	3	3		0	2	3	3
0	4	4	3		0	1	3	3
0	2	3	3		0	3	2	2
0	4	4	5		0	3	3	3

## Sheet: OVA allergic time, animal sex
Allergy score
OVA allergic times	CK		F-OVA		M-OVA
1	0	0	0.5	0.522233	0.333333	0.492366
2	0	0	1.25	0.452267	0.75	0.452267
3	0	0	2.16667	0.57735	1.66667	0.651339
4	0	0	2.45833	0.498366	2	0.603023
5	0	0	2.41667	0.514929	2.08333	0.668558
6	0	0	2.5	0.522233	2.16667	0.389249
Diarrhea score
OVA allergic times	CK		F-OVA		M-OVA
1	0	0	1	0.738549	0.583333	0.514929
2	0	0	1.83333	0.717741	1	0.603023
3	0	0	2.75	0.866025	1.83333	0.717741
4	0	0	3.33333	0.887625	2.33333	0.492366
5	0	0	3.41667	0.900337	2.83333	0.834847
6	0	0	4	0.852803	3.16667	0.937437
OVA-IgE
OVA allergic times	CK		F-OVA		M-OVA
1	8.77249	1.52521	1286.5	151.763	998.86	289.091
2	7.93551	1.00731	2913.67	343.715	1670.96	292.181
3	8.35254	1.4522	3962.59	467.453	2614.91	359.14
4	8.62817	0.9036	4382.57	441.236	3222.33	588.163
5	8.83798	0.91652	5253.04	530.609	3745.22	313.449
6	8.00451	1.36419	5733.25	519.651	4482.45	439.146

## Sheet: mice body weight
CK
Data	6.8	6.15	6.22	6.26	6.29	7.1	7.8	7.12	7.15	7.22	7.24	7.26	7.28
body weight	18.41	16.09	20.49	20.08	19.93	20.24	20.23	21.02	21.53	22.57	22.79	23.59	24.2
	17.25	18.86	19.84	20.06	20	19.72	20.2	21	22.07	22.19	21.66	21.88	22.14
	18.6	19.43	20.5	20.84	20.4	20.95	21.28	21.15	21.31	21.68	22.65	22.72	23.91
	15.4	16.86	19.02	18.62	18.72	19.05	19.49	20.15	20.04	20.93	21.02	21.46	21.26
	16.43	17.22	19.35	19.5	19.7	20.04	20.61	21.27	21.63	22.07	22.9	23.05	23.12
	16.53	17.18	18.58	18.11	17.92	17.78	18.38	18.7	18.9	19.86	19.66	20.28	20.02
	15.25	16.62	18.68	18.62	18.54	18.76	19.13	20.21	19.72	20.67	20.77	21.23	21.02
	17.26	18.8	20.02	19.99	20.05	20.32	21.61	22.38	22.37	23.03	22.93	23.02	23.76
	19.01	20.54	22.41	22.4	22.16	21.78	22.51	23.18	23.17	25.62	24.93	25.25	25.95
	15.32	16.3	17.21	17.35	16.95	17.41	18.59	18.89	19.19	19.34	19.34	18.94	19.37
	17.35	18.5	20.82	20.26	19.85	20.32	18.38	20.8	21.48	22.83	22.41	23.03	22.41
OVA
Data	6.8	6.15	6.22	6.26	6.29	7.1	7.8	7.12	7.15	7.22	7.24	7.26	7.28
body weight	16.78	17.83	18.42	19.75	19.16	19.25	20.38	20.86	20.86	22.03	21.93	21.84	22.92
	18.39	19.52	20.74	20.9	20.65	21.17	21.58	22.31	23.52	24.32	21.16	24.29	24.35
	17.3	18.03	19.86	20.51	20.58	21.17	21.15	22.09	22.42	23.38	23.57	23.67	24.72
	16.44	18.22	18.51	19.57	18.91	18.54	19.31	19.48	20.13	21.28	20.89	21.51	21.86
	16.27	17.53	18.55	19.4	18.78	18.89	19.37	19.68	20.54	21.04	20.91	21.54	22.22
	16.67	18.26	19.57	20.85	20.84	20.49	20.92	21.25	22.86	23.63	23.25	23.21	24.88
	19.6	20.15	20.7	20.79	20.54	20.76	21.5	21	21.78	22.08	22.05	22.35	22.9
	18.3	18.6	20.22	21.03	20.52	20.46	21.36	22.41	23.32	23.93	23.78	24.35	25.34
	18.12	18.9	20.05	20.31	19.37	19.36	19.83	19.68	20.19	20.48	20.09	19.83	20.75
	17.1	19.08	20.15	20.04	19.59	19.5	20.26	20.73	21.66	22.79	22.56	22.9	22.97
	15.92	18.12	17.67	18.5	17.81	17.42	18.48	18.92	20.05	20.58	20.52	20.38	20.46
	17.35	16.85	19.32	19.97	20.18	20.24	21.25	21.36	22.19	22.04	22.56	22.84	22.14
	LO
Data	6.8	6.15	6.22	6.26	6.29	7.1	7.8	7.12	7.15	7.22	7.24	7.26	7.28
body weight	16.85	18.87	20.72	20.56	21.49	21.61	23.39	23.8	23.97	23.63	23.65	23.31	25.14
	17.76	18.24	19.86	19.98	20.56	20.72	22.02	23.61	22.71	22.45	22.37	23.58	24.67
	18.22	19.34	19.22	19.74	19.56	19.68	20.56	21.71	21.88	22.37	22.54	23.23	24.34
	17.88	18.96	20.7	20.15	20.48	20.47	21.21	21.74	22.47	22.85	22.61	23.28	24.35
	18.05	18.57	20.72	20.41	21.98	21.09	22.38	22.82	22.99	23.45	21.54	21.31	23.6
	16.62	17.84	20.23	20.38	21.31	21.02	21.22	22.62	21.84	22.12	22.43	24.13	25.62
	17.14	17.86	19.78	20.16	19.62	20.08	20.96	21.86	22.17	23.12	22.93	23.4	23.4
	19.2	20.41	21.5	21.43	21.86	21.1	22.24	23.37	23.98	24.34	24.13	24.56	24.35
	17.63	17.96	18.64	18.98	18.87	19.33	20.41	21.09	21.69	21.92	21.86	22.68	22.63
	16.2	16.46	17.79	17.73	21.13	18.3	20.12	21.8	21.36	21.83	22.25	22.72	23.36
	EO
Data	6.8	6.15	6.22	6.26	6.29	7.1	7.8	7.12	7.15	7.22	7.24	7.26	7.28
body weight	20.65	21.06	20.7	20.36	20.44	20.38	21.14	21.57	22.66	22.46	22.51	22.37	23.86
	21.12	22.32	20.85	21.47	21.37	22.42	22.5	23.76	23.05	22.44	22.74	25.75	27.19
	18.52	18.43	18.6	18.92	19.31	19.84	21.36	21.68	22.25	22.7	22.62	23.01	24.69
	18.74	20.16	20.53	19.89	19.96	20.36	20.91	21.21	21.98	22.48	23.35	23.32	24.19
	19.47	19.39	21.02	20.22	20.34	20.68	21.45	22.31	22.69	23.16	22.77	23.91	24.08
	18.26	18.73	20.44	20.75	21.01	21.35	22.06	22.54	22.62	23.29	23.57	24.14	24.43
	18.16	17.33	19.1	19.24	20.03	20.41	21.11	20.71	21.15	22.5	22.6	22.24	23.48
	16.92	16.9	17.1	16.15	13.44	14.38	16.22	17	17.83	×
	16.6	17.46	17.66	18.4	18.51	18.84	19.3	20.13	20.25	21.06	20.94	21.83	22.78
	19.98	20.11	21.94	20.35	21.16	21.4	22.66	23.54	23.28	23.03	23.89	25.63	26.87
	LLEO
Data	6.8	6.15	6.22	6.26	6.29	7.1	7.8	7.12	7.15	7.22	7.24	7.26	7.28
body weight	17.2	18.83	20.82	21.19	20.04	21.28	21.88	21.77	22.11	22.18	22.83	22.79	23.09
	16.35	17.44	18.27	18.25	18.7	18.52	19.58	19.62	19.59	19.73	19.93	20.54	21.31
	17.34	17.51	19.58	20.19	20	20.57	21.41	21.04	22.39	22.49	21.2	23.8	24.39
	16.2	18.31	19.84	19.98	19.21	19.72	19.38	19.67	19.91	20.41	21.2	21.41	21.22
	20.84	22.62	23.13	22.85	20.15	22.89	23.43	23.77	24.11	24.52	24.15	25.14	25.98
	18.38	19.18	20.1	20.49	21.05	21.71	22.21	21.8	22.01	22.95	23.55	24.53	25.02
	17.96	18.82	20.02	20.24	20.29	20.45	21.12	20.83	20.81	21.11	21.5	22.31	23.41
	16.5	17.93	18.24	18.68	18.79	19.57	20.07	20.42	20.37	21.06	21.15	22.19	22.14
	16.57	17.88	19.26	19.11	19.5	19.44	19.68	19.68	20.17	20.76	20.95	21.37	22.32
	17.27	22.83	18.83	19.48	22.92	20.33	21.21	21.4	22.28	22.22	22.57	22.95	22.65
	MLEO
Data	6.8	6.15	6.22	6.26	6.29	7.1	7.8	7.12	7.15	7.22	7.24	7.26	7.28
body weight	17.05	18.66	19.84	19.78	20.22	20.32	21.14	23.02	22.8	22.13	21.89	22.92	22.81
	15.82	17.72	18.28	18.78	19.62	19.25	19.58	20.72	20.82	21.25	21.19	22.19	21.22
	16.98	18.43	19.25	19.85	20.3	20.67	20.78	21.88	21.59	21.94	22.1	22.6	23.21
	17.66	16.96	17.9	17.63	27.25	17.33	17.72	18.33	18.05	18.1	18.38	18.27	17.84
	18.36	18.52	19.6	19.15	18.95	17.91	19.67	20.21	20.11	20.68	20.45	20.77	20.43
	15.7	17	18.3	18.25	17.64	19.22	18.49	19.46	19.42	19.76	19.71	20.25	19.87
	15.98	17.95	16.87	16.93	16.75	16.89	17.77	18.51	18.05	18.27	17.35	17.83	17.19
	17.7	19.73	20.51	20.42	20.44	20.63	21.28	21.81	22.51	23.25	22.74	22.81	22.23
	17.25	17.29	19.11	19.48	19.69	20.02	19.85	21.46	21.91	22.14	21.93	23.19	22.96
	18	18.63	18.96	18.24	18.43	18.92	19.26	18.98	19.73	20.98	21.56	22.18	22.37
	16.3	17.1	18.88	19.48	19.24	19.79	20.2	20.53	20.25	20.63	19.5	19.18	18.42
	15.54	17.5	17.81	18.65	18.29	17.98	19.06	20.29	20.1	20.07	20.76	21.46	21.6
	HLEO
Data	6.8	6.15	6.22	6.26	6.29	7.1	7.8	7.12	7.15	7.22	7.24	7.26	7.28
body weight	18.43	17.04	19.25	19.37	19.51	19.92	20	21.11	21.21	21.98	22.05	22.99
	18.53	17.84	18.7	20.02	19.92	20.16	20.81	21.37	22.25	22	22. 99	23.69	22
	15.73	16.38	17.84	17.73	18.04	17.61	18.51	19.13	19.97	20.26	19.51	19.7	20.61
	17.84	19.04	19.52	18.26	18.58	18.52	18.77	19.84	20.01	20.58	20.44	21.02	21.5
	18.15	18.9	18.47	19.03	19.53	19.43	20.07	21.26	21.11	20.94	21.36	21.25	23.27
	17.1	16.4	18.45	17.97	18.58	18.78	19.56	19.16	19.91	19.97	19.57	21.13
	17.18	19.04	17.96	18.79	19.48	19.64	19.91	19.91	20.21	21	21.28	21.35	21.35
	16.88	18.47	18.8	18.66	19.96	19.46	19.69	20.67	20.53	×
	18.88	18.29	18.5	19.25	19.38	19.34	19.14	19.4	19.27	19.89	19.87	20.43	21.16
	15.76	16.72	17.73	17.62	17.92	18.46	18.41	18.51	19.37	18.79	19.86	20.31	19.32

## Sheet: Spleen weight
CK	0.102	0.0806	0.139	0.0878	0.0602	0.1066	0.0891	0.0997	0.094	0.0781	0.0787
OVA	0.1562	0.1375	0.1786	0.14	0.1828	0.1561	0.1209	0.1853	0.1273	0.1254	0.2068	0.1545
LO	0.1873	0.2181	0.1876	0.1512	0.2319	0.2207	0.1864	0.1584	0.132	0.1794
EO	0.1866	0.1771	0.1908	0.1278	0.1118	0.1944	0.1384	0.2074	0.125
LLEO	0.1392	0.1397	0.2036	0.1126	0.1712	0.2157	0.1835	0.2031	0.1737	0.1992
MLEO	0.1793	0.1728	0.1535	0.1417	0.0818	0.1621	0.1097	0.1606	0.1753	0.141	0.1405	0.1198
HLEO	0.1441	0.1618	0.1193	0.1178	0.1898	0.1535	0.162	0.1386

## Sheet: thyums weight
CK	0.0436	0.0381	0.0478	0.0262	0.0409	0.0296	0.0565	0.0448	0.0468	0.0392
OVA	0.0405	0.0368	0.0536	0.0341	0.031	0.0709	0.049	0.0984	0.0427	0.0452	0.0268	0.0458
LO	0.0532	0.0589	0.0532	0.0763	0.0367	0.0674	0.0361	0.0586	0.0482	0.0838
EO	0.0428	0.0316	0.077	0.0632	0.0403	0.043	0.056	0.0478
LLEO	0.028	0.0529	0.0427	0.0456	0.0775	0.0605	0.0533	0.0392	0.0777	0.044
MLEO	0.0501	0.0304	0.0275	0.0267	0.0478	0.0432	0.0204	0.0618	0.0683	0.0348	0.0325
HLEO	0.0518	0.0408	0.0483	0.0339	0.0575	0.0442	0.0472	0.0726

## Sheet: Jejunum histological score
CK	OVA	LO	EO	LLEO	MLEO	HLEO
1	8	7	8	7	6	4
0	9	7	7	7	6	4
0	7	7	7	6	5	3
1	8	6	6	6	5	3
0	8	7	6	5	4	2
0	9	6	7	7	4	2

## Sheet: degranulation MCs
CK	OVA	LO	EO	LLEO	MLEO	HLEO
16.25	65.23	54.35	53.15	44.35	36.45	33.15
18.35	69.21	49.53	52.14	49.47	41.15	29.25
20.12	73.33	48.59	56.14	41.39	38.49	26.37
15.11	58.45	58.48	44.49	50.15	35.14	30.17
17.53	66.65	50.32	49.53	43.17	42.13	32.19
16.48	64.33	51.71	48.44	45.17	32.19	34.25

## Sheet: Serum immune factor
IgE								IFN-γ
CK	OVA	LO	EO	LLEO	MLEO	HLEO		CK	OVA	LO	EO	LLEO	MLEO	HLEO
2822.11	9082.84	7834.14	7654.36	6923.21	7832.11	6861.81		801.577	221.392	467.873	506.314	406.85	485.36	682.19
2558.01	7971.89	7536.58	7786.36	7401.15	7594.71	7356.98		707.958	423.325	496.637	517.058	445.007	866.32	825.36											41.021
2868.51	8560.88	6936.34	7333.49	6458.46	7348.28	6744.14		812.51	386.04	547.3	472.67	429.07	685.24	723.54
2561.59	8413.14	7986.35	7243.98	6899.83	7129.44	6800.39		966.305	368.28	350.407	539.228	504.576	593.36	743.19
2476.47	8444.49	7514.33	7514.83	7263.33	7323.75	6717.67		845.201	390.27	401.805	524.045	427.48	712.08	814.19
2463.53	10112.4	7463.35	7584.18	7692.89	7030.66	6002.28		891.859	386.764	583.633	531.814	449.365	561.28	712.09
2570.66	7483.9	7415.98	7773.39	7629.17	6961.74	7305.47		837.546	560.307	358.749	511.942	422.411	523.12	623.17											28.9787
3040.29	7772.55	7614.28	7493.25	7380.32	6582.57	6577.33		900.142	351.549	343.491	594.06	476.106	514.28	725.81
OVA-IgE								IL-4
CK	OVA	LO	EO	LLEO	MLEO	HLEO		CK	OVA	LO	EO	LLEO	MLEO	HLEO
7.6063	3493.4	3012.6	2477.8	1873.67	2134.28	893.4		43.28	80.93	65.31	80.34	102.52	45.25	78.25
10.4018	4227.6	3494.4	2746.11	2003.34	1849.37	1117.81		75.36	140.25	84.25	90.36	55.37	67.82	94.36
7.6063	4914.6	3083.72	2473.4	1423.52	1983.35	1024.23		62.54	132.52	95.25	90.57	66.39	84.19	72.16
7.6063	3943.16	3320.4	3336.6	1449.6	2257.48	936.47		66.1	120.25	99.47	90.88	90.47	66.39	63.3
6.2093	4305.4	2306.12	2086.46	2311.46	2035.21	999.47		63.25	105.13	75.32	66.17	90.82	84.29	58.1
8.42	3794.4	2272.22	1570.44	2932.71	2019.71	1039.8		64.84	152.35	80.13	74.28	81.25	77.98	42.17
OVA-IgA
CK	OVA	LO	EO	LLEO	MLEO	HLEO		IL-5
207.018	2203.47	1836.34	1742.07	1613.15	1210.45	891.753		CK	OVA	LO	EO	LLEO	MLEO	HLEO
209.767	2276.04	1784.25	1836.39	1617.57	1211.01	703.422		12.02	30.25	19.82	14.31	16.35	10.25	9.85
297.228	2207.24	1708.94	1845.87	1771.01	1191.42	770.379		8.15	15.82	12.36	16.3	18.2	12.31	10.36
172.633	2182.77	1833.47	1802.72	1684.34	1161.12	614.807		7.87	16.82	20.63	10.28	20.33	10.88	10.87
224.136	2222.96	1836.49	1688.45	1440.14	1209.22	974.963		8.92	19.2	13.47	16.85	10.52	10.2	9.67
208.135	2184.66	1683.07	1688.52	1602.38	1166.48	885.516		6.36	28.44	15.82	16.74	16.44	10.47	9.94
239.848	2256.37	1725.88	1793.31	1714.09	1184.73	791.656		8.84	14.28	16.94	17.63	15.34	10.68	9.43
160.352	2257.92	1586.33	1742.28	1533.15	1360.09	897.142
187.835	2221.33	1609.37	1768.06	1656.46	1174.37	748.071
								IL-13(pg/ml)
OVA-IgG1								CK	OVA	LO	EO	LLEO	MLEO	HLEO
CK	OVA	LO	EO	LLEO	MLEO	HLEO		22.09	34.1322	33.0102	31.6533	32.123	33.4538	29.0179
29.264	1991.61	1225.88	1002.25	1090.31	1233.51	869.17		23.2772	34.9933	37.2504	31.6925	36.846	33.5843	23.3555
33.2032	1761.56	1347.86	1183.74	1037	1402.89	956.31		31.7186	45.1438	33.6104	40.3686	35.1368	29.7746	30.2051
28.1216	1894.92	1100.26	1153.87	765.459	1023.36	1097.23		24.1514	34.8107	27.2304	33.8843	36.2328	34.3932	21.6594
29.8688	1846.41	1155.78	802.117	1394.71	1248.09	693.17		27.1391	40.3164	31.7055	39.1683	32.3579	33.5712	27.6218
31.6864	1742.55	1295.8	1061.23	1216.14	936.39	1033.49		25.4822	35.9588	27.1913	35.0586	40.8122	37.4983	30.8444
31.1744	1904.48	1203.22	947.749	883.283	1433.36	986.38
35.456	1861.07	1241.08	1100.65	1065.46	1208.91	947.18
								IL-10(pg/ml)
OVA-IgG2a								CK	OVA	LO	EO	LLEO	MLEO	HLEO
CK	OVA	LO	EO	LLEO	MLEO	HLEO		276.007	155.006	227.556	180.118	210.196	170.33	227.574
485.834	3450.11	2810.78	2073.79	2933.84	863.36	743.39		321.336	151.828	222.073	202.966	208.472	330.044	322.301
422.869	3286.84	2511.76	1943.24	2207.48	1253.63	657.18		319.48	150.131	251.957	249.989	196.992	262.674	327.423
389.302	3946.98	1873.55	1691.6	2217.43	1577.18	1025.98		222.658	224.901	181.328	210.392	195.611	209.196	327.549
402.29	3902.18	1806.36	2420.09	2085.71	625.81	745.19		362.035	224.77	214.021	188.638	185.123	324.658	218.363
436.209	4149.07	2718.72	1441.62	2990.33	583.91	825.64		242.816	199.18	207.89	200.579	228.204	316.518	329.113
346.062	3799.34	2617.67	2158.31	1864.84	1025.6	888.91		246.314	132.288	175.467	229.218	172.081	325.284	424.379
332.845	3681.08	2024.62	1850.92	2964.94	999.02	1034.25		254.825	201.052	186.334	163.331	220.64	432.498	187.964
HIS								TGF-β(pg/ml)
CK	OVA	LO	EO	LLEO	MLEO	HLEO		CK	OVA	LO	EO	LLEO	MLEO	HLEO
282.108	902.843	693.211	782.108	681.814	253.32	233.56		93.51	38.9886	40.5901	48.5369	91.9537	85.8345	78.119
255.015	771.887	740.152	954.706	735.985	652.17	523.31		100.79	96.2526	78.5107	106.426	69.5626	82.869	94.464
286.505	850.882	648.456	834.284	674.142	485.15	225.81		108.546	47.9313	108.952	72.9041	80.7546	89.3017	87.965
251.593	843.137	689.828	819.436	680.392	432.25	294.16		91.6	37.2137	90.5236	75.4317	71.6771	82.2897	93.009
247.471	844.485	723.333	723.75	677.672	253.62	496.87		87.78	74.8873	79.6694	75.5017	89.9	76.2086	84.495
263.529	1012.43	762.892	803.662	602.279	455.31	498.02		124.644	51.3743	65.8763	117.921	74.303	96.0616	96.852
250.662	748.897	769.167	791.74	735.466	493.32	484.25		98.5666	52.4298	86.4627	71.9887	84.884	92.845	97.749
300.294	772.549	738.319	858.574	657.328	425.32	467.23
								IL-6(pg/ml)
								CK	OVA	LO	EO	LLEO	MLEO	HLEO
								70.577	121.392	97.873	86.314	106.85	62.34	50.36
								67.958	143.325	96.637	117.058	95.007	84.22	65.39
								61.51	166.04	147.3	72.67	129.07	89.47	82.47
								66.305	128.28	85.407	99.228	94.576	75.82	81.29
								55.201	100.27	101.805	94.045	127.48	78.93	75.08
								59.859	86.764	93.633	91.814	89.365	80.25	71.97
								52.546	130.307	98.749	111.942	112.411	75.23	85.23
								60.142	141.549	143.491	94.06	96.106	71.29	75.67
								IL-17(pg/ml)
								CK	OVA	LO	EO	LLEO	MLEO	HLEO
								18.9047	26.7585	25.1852	17.3445	19.9523	23.23	18.65
								21.0472	24.224	25.8232	25.5387	25.1073	25.18	17.32
								15.1635	28.6076	20.5084	23.28	22.3231	18.97	21.33
								13.8961	29.2068	23.4309	25.1033	27.6074	20.58	21.47
								18.0513	27.3448	26.3965	20.3101	24.6895	20.33	21.85
								19.7238	30.6121	29.6595	25.3749	29.53	20.47	20.36
								23.8532	32.5217	28.3923	28.25	22.961	20.14	19.31
								18.5988	30.5259	27.6293	27.7112	28.551	20.19	21.03
								TNF-α (pg/g)
								CK	OVA	LO	EO	LLEO	MLEO	HLEO
								353.685	577.949	554.698	438.471	504.525	323.37	301.28
								361.357	478.6	437.248	468.416	475.452	354.28	286.74
								272.765	565.267	442.12	342.978	352.25	397.25	389.34
								232.413	575.487	395.485	428.388	498.36	361.38	368.1
								378.24	447.8	396.408	362.71	424.445	301.98	354.21
								320.94	467.378	389.23	358.039	450.802	403.58	349.3
								334.259	469.663	471.01	313.528	353.497	342.19	325.17
								331.894	530.843	390.18	463.686	375.535	312.28	345.85
